1 **Subgrouping multimorbid patients with ischemic heart disease by**  
2 **means of unsupervised clustering: A cohort study of 72,249**  
3 **patients defined by 3,046 diagnoses**

4

5 Short title: Unsupervised clustering of patients with ischemic heart disease

6

7 Amalie D. Haue<sup>1,2,¶</sup>, Peter C. Holm<sup>1,¶</sup>, Karina Banasik<sup>1</sup>, Agnete T. Lundgaard<sup>1</sup>, Victorine P. Muse<sup>1</sup>, Timo  
8 Röder<sup>1</sup>, David Westergaard<sup>1</sup>, Piotr J. Chmura<sup>1</sup>, Alex H. Christensen<sup>2,3</sup>, Peter EK. Weeke<sup>2</sup>, Erik Sørensen<sup>4</sup>, Ole  
9 BV. Pedersen<sup>4,5</sup>, Sisse R. Ostrowski<sup>4,6</sup>, Kasper K. Iversen<sup>3</sup>, Lars V. Køber<sup>2,6</sup>, Henrik Ullum<sup>7</sup>, Henning  
10 Bundgaard<sup>2,5\*</sup>, Søren Brunak, PhD<sup>1,8\*</sup>

11

12 <sup>1</sup>Novo Nordisk Foundation Center for Protein Research, Faculty of Health and Medical Sciences, University of  
13 Copenhagen, Copenhagen, Denmark

14 <sup>2</sup>Department of Cardiology, The Heart Center, Rigshospitalet, Copenhagen, Denmark

15 <sup>3</sup>Department of Cardiology, Copenhagen University Hospital, Herlev, Denmark

16 <sup>4</sup>Department of Clinical Immunology, Copenhagen University Hospital, Copenhagen, Denmark

17 <sup>5</sup>Department of Clinical Immunology, Zealand University Hospital, Køge, Denmark

18 <sup>6</sup>Department of Clinical Medicine, University of Copenhagen, Rigshospitalet, Copenhagen, Denmark

19 <sup>7</sup>Statens Serum Institut, Copenhagen, Denmark

20 <sup>8</sup>Copenhagen University Hospital, Rigshospitalet, Copenhagen, Denmark

21

22 \*E-mail: [soren.brunak@cpr.ku.dk](mailto:soren.brunak@cpr.ku.dk) (SB)

23

24 <sup>¶</sup>These authors contributed equally to this work.

## 25 **Abstract**

26 **Background:** There are no methods for classifying multimorbid patients with ischemic heart  
27 disease (IHD), although such methods might be clinically useful due to the marked  
28 differences in presentation and disease-course.

29 **Methods:** A population-based cohort study from a Danish secondary care setting of patients  
30 with IHD (2004-2016) and subjected to a coronary angiography (CAG) or coronary  
31 computed tomography angiography (CCTA). Data sources were The Danish National Patient  
32 Registry, in-hospital laboratory data, and genetic data from Copenhagen Hospital Biobank.  
33 Comorbidities included diagnoses assigned prior to presentation of IHD. Patients were  
34 clustered by means of the Markov Clustering Algorithm based on the entire spectrum of  
35 registered multimorbidity. The two prespecified outcomes were: New ischemic events  
36 (including death from IHD causes) and death from non-IHD causes. Patients were followed  
37 from date of CAG/CCTA until one of the two outcomes occurred or end of follow-up,  
38 whichever came first. Biological and clinical appropriateness of clusters was assessed by  
39 comparing risks (estimated from Cox proportional hazard models) in clusters and by  
40 phenotypic and genotypic enrichment analyses, respectively.

41 **Findings:** In a cohort of 72,249 patients with IHD (mean age 63.9 years, 63.1% males), 31  
42 distinct clusters (C1-31, 67,136 patients) were identified. Comparing each cluster to the 30  
43 others, eight clusters (9,590 patients) had statistically significantly higher (five clusters) or  
44 lower (three clusters) risk of new ischemic events; 18 clusters (35,982 patients) had a higher  
45 (11 clusters) or lower (seven clusters) risk of death from non-IHD causes. All clusters at  
46 increased risk of new ischemic events, associated with risk of death from non-IHD causes as  
47 well. Cardiovascular or inflammatory diseases were the commonly enriched in clusters (13),  
48 and distributions for 24 laboratory test results differed significantly across clusters. Polygenic  
49 risk scores for atrial fibrillation and diabetes were increased in x and y clusters respectively.

50 **Conclusions:** Clustering of patients with IHD based on comorbidities identified subgroups of  
51 patients with significantly different clinical outcomes. This novel approach may support  
52 differentiation of treatment intensity dependent on expected outcomes.

## 53 **Non-standard abbreviations**

54 CAG: Coronary arteriography

55 CCTA: Coronary computed tomography angiography

56 ICD-10: International Statistical Classification of Diseases and Related Health Problems 10th

57 Revision

58 IHD: Ischemic heart disease

59 MCL: Markov clustering

60 NPR: Danish National Patient Registry (NPR)

61 O/E-ratio: Observed-expected-ratio

62 PRS: Polygenic risk score

## 63 **Introduction**

64 Ischemic heart disease (IHD) is a common, chronic, complex disease and mode of onset,  
65 disease burden and disease progression vary considerably between patients(1–3). This  
66 heterogeneity relates to several factors, but a major contribution is multimorbidity as more  
67 than 85% of IHD patients are diagnosed with other chronic diseases; a phenomenon coined  
68 cardiometabolic multimorbidity(4,5). The increased mortality in patients with  
69 cardiometabolic multimorbidity is generally only related to single disease states, such as  
70 obstructive lung disease, diabetes, or stroke, although it is known that the risk of  
71 cardiovascular diseases is increased in many chronic, inflammatory disorders(6,7). As more  
72 patients at older age and with more and more co-morbidities are seen, new methods for  
73 characterizing and studying cardiometabolic multimorbidity are needed(8–11).

74

75 Unsupervised clustering algorithms can systematically reveal structures in large, feature-rich  
76 datasets and may be used to identify distinct patient subgroups within a heterogenous  
77 population(12). Proof-of-concept analyses of cardiovascular phenotypes, including IHD,  
78 heart failure, diabetes, and atrial fibrillation have already been performed(13–19). While  
79 these studies successfully identify subgroups resembling those from traditional analyses, they  
80 often fail to demonstrate that clustering analysis leads to novel understanding of a given  
81 dataset. Rather, they are typically restricted to characterize high-, medium-, and low-risk  
82 subgroups which by and large resemble more conservative approaches from an earlier, less  
83 data-rich, epoch(20).

84

85 For decades, Danish healthcare registries have had a strong position within epidemiological  
86 research(20–22). Given the opportunities for using clinical data more extensively, we carried  
87 out an unsupervised clustering analysis of 72,249 patients with IHD based on their entire

88 disease history until IHD onset. Explicitly, we wanted to classify IHD based on the entire  
89 spectrum of multimorbidity. We identified distinct patient subgroups derived from a total of  
90 3,046 diagnoses assigned prior to IHD onset. The biological and clinical appropriateness  
91 of the patient subgroups identified by unsupervised clustering analysis was asserted by  
92 assessments of their associations with clinical outcomes and clinical characteristics,  
93 laboratory data, and genetics (Figure 1).

94

**Fig 1**

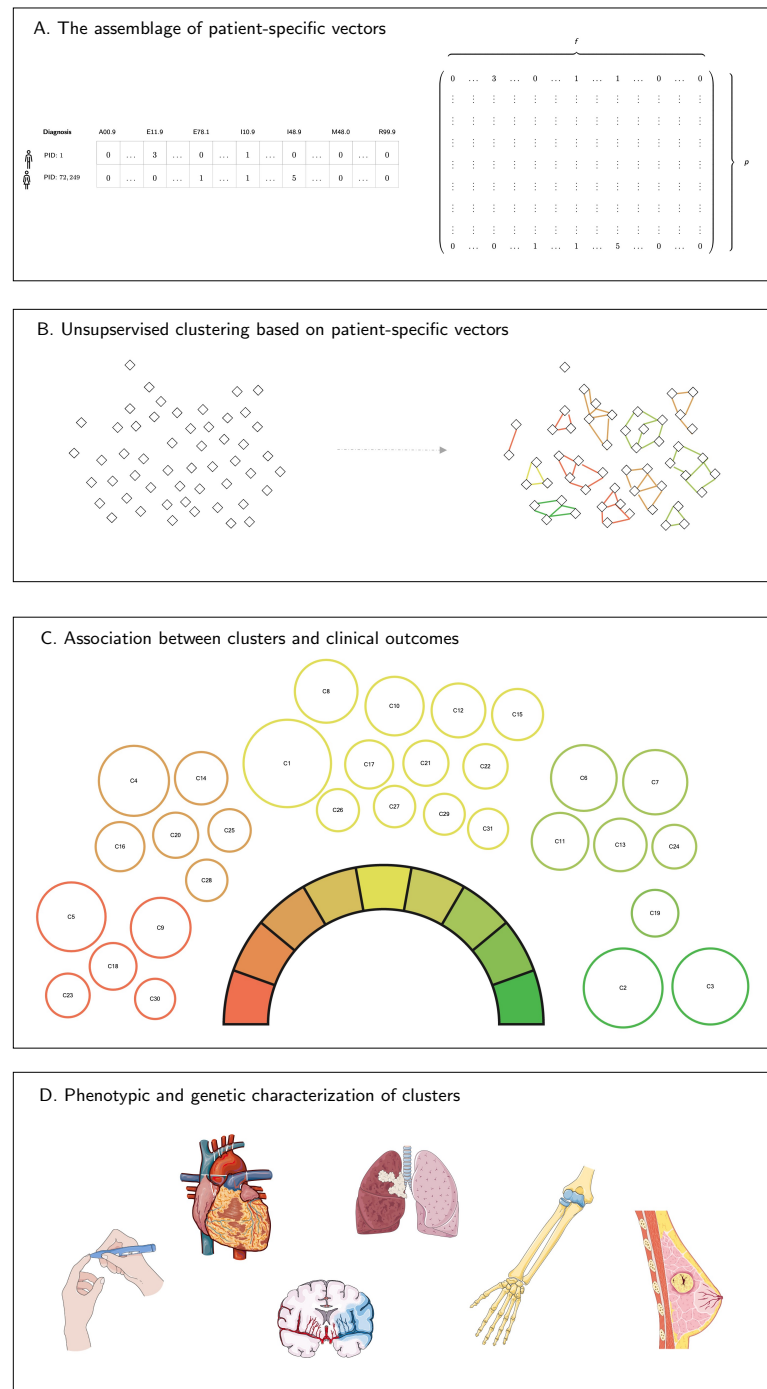

95 **Fig 1: Graphical overview of study.** Conceptual figure displaying the cohort of patients  
 96 with IHD. A.: Assemblage of patient-specific vectors and an  $f \times p$  matrix, where  $f$   
 97 corresponds to the number of diagnoses and  $p$  corresponds to the number of included patients  
 98 B: Unsupervised clustering of IHD patients using the MCL algorithm. that were the basis for

99 construction of a matrix. C: which was the basis for performing unsupervised clustering to  
100 identify distinct clusters. D: Cluster-based risk stratification of cohort. Red: Increased risk of  
101 both outcomes. Orange: Increased risk of death from non-IHD causes, only. Yellow: No  
102 statistically significant associations. Light green: Reduced risk of death from non-IHD  
103 causes. Dark green: Reduced risk of new ischemic events or non-IHD causes. E: Phenotypic  
104 and genetic characterization of clusters. IHD: Ischemic heart disease. MCL: Markov  
105 Clustering.



## 106 **Methods**

### 107 *Data sources, study population, and outcomes*

108 Data from the Danish National Patient Registry (NPR) and the Danish Registry for Causes of  
109 Death were linked to in-hospital electronic health data covering the two Danish healthcare  
110 regions in Eastern Denmark (~2.9 mil inhabitants), and the Copenhagen Hospital Biobank  
111 Cardiovascular Disease Cohort(21,23,24). Linkage of different healthcare data sources was  
112 obtained via the personal identification number and only patients admitted to a hospital in  
113 Eastern Denmark in years 2004 to 2016 were considered(25). We identified all patients in  
114 NPR who were assigned an ICD-10 code for IHD(26). To increase the positive predictive  
115 value of IHD diagnoses and align included patients in time, we further required that patients  
116 had been subjected to coronary arteriography (CAG) or coronary computed tomography  
117 angiography (CCTA). To qualify that CAG/CCTAs were conclusive for IHD, patients were  
118 only included if the CAG/CCTA was performed during a contact where patients were  
119 assigned an ICD-10 code for IHD. We set the earliest CAG/CCTA fulfilling this criterium as  
120 the index date and excluded patients with an index date before year 2004 or after 2016 (Fig  
121 2).

Fig 2

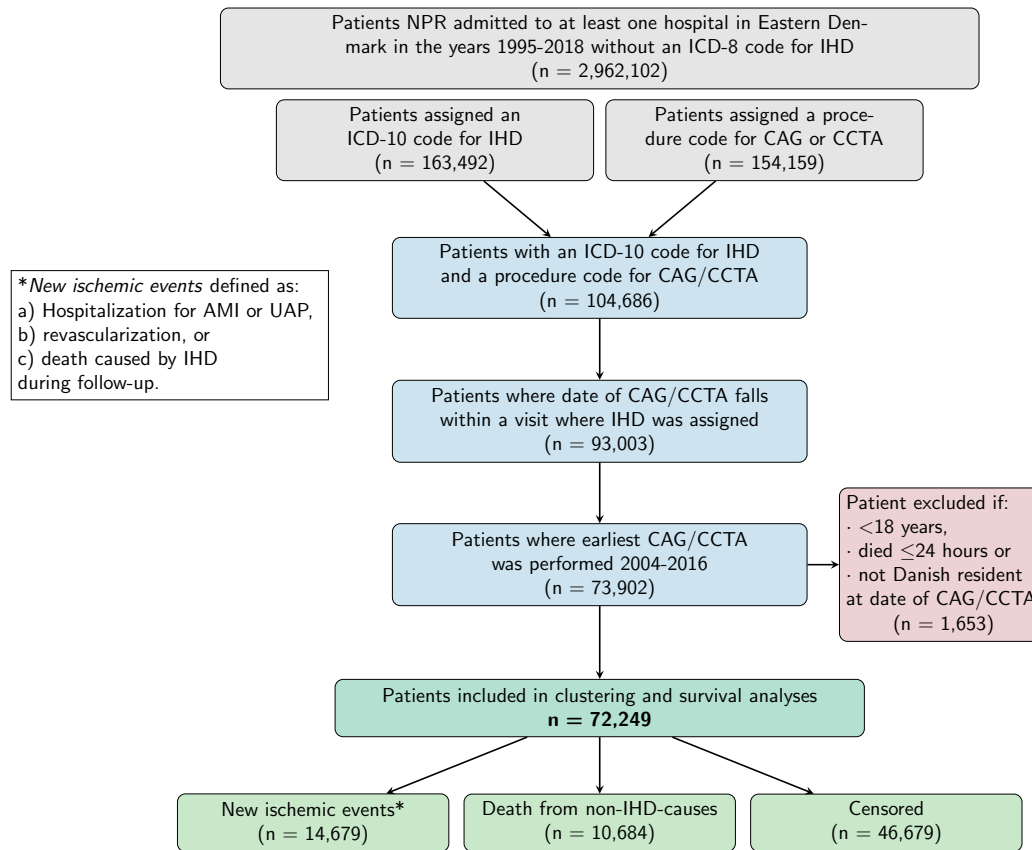

122

123 **Fig 2: Flowchart: Data sources, study population, and outcomes.** Gray: Identification.

124 Blue: Screening. Red: Eligibility. Green: Inclusion and outcomes. AMI: Acute myocardial

125 infarction. UAP: Unstable angina pectoris. NPR: The Danish National Patient Registry. IHD:

126 ischemic heart disease (ICD-10 codes I20-I25). CAG: Coronary arteriography. CCTA:

127 Coronary computed tomography angiography. ICD-10: International Statistical Classification

128 of Diseases and Related Health Problems 10<sup>th</sup> Revision. SKS: Sundhedsvæsenets

129 Klassifikationssystem (The Danish Health Authority Classification System).

130 There were two predefined outcomes: 1) New ischemic events and 2) Death from other  
131 causes than IHD (non-IHD causes). The outcome “new ischemic event” was a composite  
132 outcome of a) hospitalization minimum 30 days after index for myocardial infarction or  
133 unstable angina pectoris (i.e., hospitalization with myocardial infarction or unstable angina  
134 pectoris as the primary diagnosis), b) revascularization not related to the index date and c)  
135 any death where IHD was listed as the primary or secondary cause. Outcomes were obtained  
136 from NPR and Danish Registry for Causes of Death. Eligible codes for inclusion, outcomes  
137 and specific cutoffs are available in S1 Fig and S1 Table.

138

### 139 *Data preprocessing and application of the Markov cluster algorithm*

140 We performed a clustering analysis of included patients based on their multimorbidity prior  
141 to their IHD diagnosis (index) using the Markov cluster (MCL) algorithm(27).  
142 Multimorbidity was represented as patient-specific vectors using diagnoses assigned prior to  
143 or at index. ICD-10 codes assigned to less than five patients (n=1,673) were excluded from  
144 the analysis owing to legal regulations in Denmark. As we focused the studies on  
145 multimorbidity in IHD, ICD-10 codes for IHD (I20-I25) were excluded from patients-specific  
146 vectors. Thus, a total of 3,046 ICD-10 codes were the basis for constructing a patient  
147 similarity network that was used as MCL algorithm input. Patient-specific vectors consisted  
148 of length 3,046 with integers indicating the number of times a patient had been assigned a  
149 particular ICD-10 code. The length of the vectors corresponded to the number of input  
150 features (ICD-10 codes). By combining the patient-specific vectors from all included  
151 patients, a matrix of size  $p \times f$  was constructed, where  $p$  indicates the number of included  
152 patients and  $f$  indicates the number of input features (ICD-10 codes). Following a series of  
153 preprocessing steps, a patient similarity network was created based on the  $p \times f$  matrix and  
154 used as input for the MCL algorithm(28). Resulting clusters were denoted  $C$  followed by an

155 integer indicating the rank of the clusters with respect to cluster size (number of patients).  
156 Thus, C1 denotes the largest cluster and cluster-membership was used to denote a cluster as a  
157 covariate in subsequent analyses. Robustness of clustering was assessed by generating a  
158 series of diluted and shuffled versions of the resulting clusters (reference clustering), and  
159 their similarity was quantified using the variance of information measure as previously  
160 described(29). Explicitly, a series of diluted and shuffled versions of the input graph were  
161 generated(30). In total, 500 variations of the input graph were constructed by shuffling and  
162 deleting edges, respectively. The variation in the graphs was then quantified by means of  
163 variation of information parameter. Details regarding the MCL settings and a description of  
164 cluster robustness assessment are available in the S1 Appendix.

165

#### 166 *Preprocessing of laboratory and genetic data*

167 Clusters were characterized by laboratory and genetic data based on the subset of patients  
168 where these data types were available. A panel of 25 different lab parameters was included in  
169 the analyses. Only tests taken up to 90 days before index or at the day of index were included.  
170 Included lab tests were plasma levels of potassium, sodium, hemoglobin, estimated  
171 glomerular filtration rate (eGFR), creatinine, carbamide, glucose, troponin (I/T), HDL  
172 cholesterol, LDL cholesterol, total cholesterol, leukocytes, C-reactive protein, lymphocytes,  
173 monocytes, neutrophils, basophils, platelets, INR, alanine transaminase, albumin, alkaline  
174 phosphatase, bilirubin, and triglyceride. For every cluster, a *score* was computed based on the  
175 number of patients with a lab test below, within, or above the standard reference value,  
176 indicated by -1, 0 and 1, respectively. *Score* was defined as the mean of the summarized  
177 values per cluster.

178

179 Autosomal genotype data were obtained by identifying included patients who were also  
180 among the study participants in the Copenhagen Hospital Biobank – Cardiovascular Disease  
181 Cohort(24). For included patients with genetic data available, we calculated polygenic risk  
182 scores (PRSs) for 14 traits, obtained from nine GWAS meta-analyses (atrial fibrillation, BMI-  
183 adjusted non-insulin diabetes, chronic kidney disease, HDL cholesterol levels, heart failure,  
184 LDL cholesterol levels, stroke, total cholesterol levels, triglyceride levels)(31–36) and five  
185 GWAS (acute myocardial infarction, coronary artery disease, diastolic blood pressure, non-  
186 alcoholic fatty liver disease, systolic blood pressure)(37–40). PRSs were calculated using the  
187 “LDpred2-auto” algorithm, implemented in the R package “bigsnpr” (version 1.11.6) with R  
188 version 4.0.0 and the workflow management system Snakemake(41–43). Each trait’s PRS  
189 distribution was scaled to a mean of zero and a standard deviation of one.

190

#### 191 *Statistical analyses of clusters identified by the MCL algorithm*

192 As the study was designed to identify patient subgroups and not individual variation, clusters  
193 of size < 500 were excluded from the remaining analyses. Mean age at IHD onset in each  
194 cluster was compared to the mean age at onset in all the other clusters using Tukey’s Honest  
195 Significant Difference (HSD) method. Significance level was set to 0.05 and P-values were  
196 adjusted assuming 465 tests (adj. P-val.).

197

198 To investigate the association between cluster-membership and the competing risks of new  
199 ischemic events and death from non-IHD causes, we used Cox proportional-hazards models  
200 (Cox models). Patients were followed from index until occurrence of either of the two  
201 outcomes, or end of follow-up (year 2018), whichever came first. The dependent variable was  
202 either risk of new ischemic events or death from non-IHD causes, and the independent  
203 variables were cluster, sex, and age at index. To age-adjust the models, analyses were

204 performed using restricted cubic spline with three knots for age at index. Follow-up time was  
205 truncated to a maximum of five years. For each cluster, hazard ratios (HRs) and 95%  
206 confidence intervals (CIs) were estimated by comparing HRs for the members of the cluster  
207 with the HRs with that of non-members.

208

209 Further characterization of clusters consisted of: (1) phenotypic enrichment analysis, (2)  
210 characterization of clusters with respect to their laboratory profiles and (3) a test for genetic  
211 enrichment. The phenotypic enrichment analysis was carried out based on ratios between  
212 Observed (O) and Expected (E) frequencies of diagnoses in the clusters (O/E-ratios). That is,  
213 ratios between the frequencies of ICD-10 codes in each cluster (observed frequencies) and  
214 the frequencies of ICD-10 codes in the entire population (expected frequencies) were  
215 calculated and expressed as O/E-ratios(44). In subsequent characterization of clusters,  
216 enrichment denoted O/E-ratios  $> 2$ , and clusters were characterized as having little  
217 enrichment if the sum of the ten largest O/E-ratios  $< 50$ . Inverse changes were used to denote  
218 O/E-ratios between 0 and 1.

219

220 Hierarchical clustering was applied to estimate the cluster similarity with respect to the  
221 laboratory tests using the Euclidean distance between the *score* of each cluster for each test.

222

223 For each of the fourteen traits we calculated PRSs for, we used Wilcoxon rank-sum tests to  
224 compare the PRS distribution of each cluster to the combined PRS distribution of PRSs in all  
225 other clusters. Resulting P-values were converted to the false discovery rate (FDR) to account  
226 for multiple testing, with a total of 434 tests. We report effect sizes as calculated by the  
227 “wilcox.test” function built into R version 4.0.0. Level of significance was set to  $FDR < 0.05$ ,  
228 assuming 434 tests.

229

230 Further details regarding preprocessing and analyses of laboratory and genetic data are  
231 available in the S2 Appendix.

## 232 **Results**

### 233 *Cohort demographics and co-morbidities*

234 A total of 72,249 patients (63.1% males, mean age 63.9 years) were included (Table 1).  
235 Angina pectoris (I20) was the most common IHD diagnosis (38,239 patients, 52.9%),  
236 followed by acute myocardial infarction (I21) (33,229 patients, 46.0 %) and chronic IHD  
237 (I25) (22,750 patients, 31.5%). The most common co-morbidity prior to the IHD index was  
238 hypertension (I10.9) (24,818 patients, 34.4%) followed by dyslipidemia (E78.0) (12,780  
239 patients, 17.7%) and non-insulin dependent diabetes (E11.9) (7,551 patients, 10.5%). Prior to  
240 index, the mean number of diagnoses per patient was 8.1. A total of 68,103 patients (94.3%)  
241 were co-morbid at index. The overall incidence (new ischemic events and death from non-  
242 IHD causes) was 94 events per 1000 person-years (Table 1).

243

244

**Table 1: Patient demographics, comorbidities, and outcomes**

| <b>Cohort demographics</b>                                                | <b>Total</b>                            | <b>Males</b>  | <b>Females</b> |
|---------------------------------------------------------------------------|-----------------------------------------|---------------|----------------|
| Number of patients (%)                                                    | 72,249                                  | 45,576 (63.1) | 26,673 (36.1)  |
| Mean age at index (SD)                                                    | 63.9 (11.9)                             | 62.9 (11.6)   | 65.6 (12.1)    |
| <b>IHD manifestations (ICD-10)</b>                                        | <b>Total</b>                            | <b>Males</b>  | <b>Females</b> |
| Angina pectoris (I20)                                                     | 38,239                                  | 22,628        | 15,611         |
| Acute myocardial infarction (I21)                                         | 33,299                                  | 27,720        | 10,579         |
| Subsequent myocardial infarction (I22)                                    | 61                                      | 34            | 27             |
| Certain current complications following acute myocardial infarction (I23) | 138                                     | 92            | 46             |
| Other acute ischemic heart diseases (I24)                                 | 1,341                                   | 814           | 527            |
| Chronic ischemic heart disease (I25)                                      | 22,750                                  | 14,589        | 8,152          |
| <b>Common comorbidities (ICD-10)</b>                                      | <b>Total</b>                            | <b>Males</b>  | <b>Females</b> |
| Primary (essential) hypertension (I10.9)                                  | 24,818                                  | 14,508        | 10,310         |
| Hypercholesterolemia (E78.0)                                              | 12,780                                  | 7,842         | 4,938          |
| Non-insulin dependent diabetes (E11.9)                                    | 7,551                                   | 4,891         | 2,660          |
| Atrial fibrillation and atrial flutter, unspecified (I48.9)               | 7,075                                   | 4,509         | 2,566          |
| Heart failure, unspecified (I50.9)                                        | 6,160                                   | 4,059         | 2,101          |
| Chest pain, unspecified (R07.9)                                           | 5,863                                   | 3,441         | 2,422          |
| Senile cataract, unspecified (H25.9)                                      | 5,764                                   | 2,795         | 2,969          |
| Pneumonia, unspecified (J18.9)                                            | 5,469                                   | 3,236         | 2,260          |
| Hyperlipidemia, unspecified (E78.5)                                       | 5,002                                   | 3,306         | 1,696          |
| Chronic obstructive pulmonary disease (J44.9)                             | 4,621                                   | 2,449         | 2,172          |
| <b>Outcomes, number of cases</b>                                          | <b>Total</b>                            | <b>Males</b>  | <b>Females</b> |
| New ischemic events (%)                                                   | 14,679                                  | 10,152        | 4,527          |
| ■ Myocardial infarction                                                   | 5,833                                   | 3,709         | 2,124          |
| ■ Revascularization                                                       | 6,282                                   | 4,718         | 2,124          |
| ■ Death caused by IHD                                                     | 2,563                                   | 1,724         | 839            |
| Death from non-IHD causes (%)                                             | 10,684                                  | 6,710         | 3,974          |
| Censored (%)                                                              | 46,886                                  | 28,713        | 18,172         |
| <b>Outcomes, time to event</b>                                            | <b>Mean time to event in years (SD)</b> |               |                |
|                                                                           | <b>Total</b>                            | <b>Males</b>  | <b>Females</b> |
| New ischemic events                                                       | 1.48 (1.40)                             | 1.49 (1.41)   | 1.48 (1.40)    |
| ■ Myocardial infarction                                                   | 2.40 (1.87)                             | 2.41 (1.89)   | 2.38 (1.85)    |
| ■ Revascularization                                                       | 2.25 (1.88)                             | 2.28 (1.89)   | 2.16 (1.84)    |
| ■ Death caused by IHD                                                     | 1.92 (1.13)                             | 1.95 (2.02)   | 1.88 (2.05)    |
| Death from non-IHD causes                                                 | 2.16 (1.50)                             | 2.14 (1.49)   | 2.20 (1.51)    |
| Censored                                                                  | 4.37 (1.08)                             | 4.36 (1.09)   | 4.39 (1.06)    |
| Total                                                                     | 3.72 (1.64)                             | 3.67 (1.67)   | 3.81 (1.60)    |



246 *Unsupervised clustering of multimorbid patients with IHD*

247 In the cohort, the MCL algorithm identified 36 distinct clusters based on the set of 3,046  
248 ICD-10 codes assigned to the patients prior to or at index. The 36 clusters contained a total of  
249 68,084 patients. The remaining 4,365 patients in the cohort (6,0%) that did not cluster were  
250 primarily patients with no diagnoses prior to index (>99%). This observation served as a  
251 negative control as the MCL algorithm correctly identified patients without registered co-  
252 morbidity prior to index. Further, clusters robustness was assessed as described in Methods  
253 with a reasonable variation of information. Next, the 31 of the 36 clusters with >500 patients  
254 (67,136 patients) were characterized (Table 2). Using Tukey's HSD to compare the age at  
255 index between all 31 clusters (a total of 466 combinations), we found significant differences  
256 in 391 comparisons (S3 Table). For demographics of patients that did not cluster or were in  
257 clusters of size < 500, see S4 Table.

**Table 2: Cluster demographics, characteristics, and associations with outcomes**

| Cluster | Size  | Mean age at index in years (SD) | Males | Females | New ischemic events |             | Death from non-IHD causes |             |
|---------|-------|---------------------------------|-------|---------|---------------------|-------------|---------------------------|-------------|
|         |       |                                 |       |         | HR                  | Adj. P-val. | HR                        | Adj. P-val. |
| C1      | 7,191 | 64.8 (11.3)                     | 3,897 | 3,294   | 1.000               | > 0.050     | 0.856                     | > 0.050     |
| C2      | 5,990 | 58.6 (11.5)                     | 2,862 | 3,127   | 0.825               | < 0.001     | 0.600                     | < 0.001     |
| C3      | 4,641 | 56.8 (11.4)                     | 2,727 | 1,914   | 0.757               | < 0.001     | 0.586                     | < 0.001     |
| C4      | 4,401 | 69.6 (10.2)                     | 2,853 | 1,548   | 0.920               | > 0.050     | 1.461                     | < 0.001     |
| C5      | 4,290 | 63.9 (10.7)                     | 2,803 | 1,487   | 1.402               | < 0.001     | 1.629                     | < 0.001     |
| C6      | 3,589 | 59.7 (10.9)                     | 2,388 | 1,201   | 0.969               | > 0.050     | 0.675                     | < 0.001     |
| C7      | 3,309 | 63.8 (11.0)                     | 2,025 | 1,284   | 0.889               | > 0.050     | 0.611                     | < 0.001     |
| C8      | 2,802 | 71.1 (10.9)                     | 1,867 | 935     | 0.943               | > 0.050     | 0.842                     | > 0.050     |
| C9      | 2,581 | 63.7 (11.8)                     | 1,803 | 778     | 1.314               | < 0.001     | 1.789                     | > 0.050     |
| C10     | 2,562 | 74.2 (9.6)                      | 1,225 | 1,337   | 0.978               | > 0.050     | 0.928                     | > 0.050     |
| C11     | 2,292 | 66.1 (11.0)                     | 2,186 | 106     | 0.926               | > 0.050     | 0.650                     | < 0.001     |
| C12     | 2,213 | 70.3 (10.2)                     | 2,068 | 145     | 0.920               | > 0.050     | 0.805                     | > 0.050     |
| C13     | 2,070 | 58.6 (10.2)                     | 1,348 | 722     | 0.946               | > 0.050     | 0.577                     | < 0.050     |
| C14     | 2,070 | 68.2 (9.6)                      | 1,030 | 1,010   | 1.146               | > 0.050     | 3.390                     | < 0.001     |
| C15     | 2,040 | 63.9 (10.1)                     | 1,208 | 805     | 1.031               | > 0.050     | 0.784                     | > 0.050     |
| C16     | 1,654 | 64.1 (12.1)                     | 1,013 | 641     | 1.107               | > 0.050     | 1.761                     | < 0.001     |
| C17     | 1,281 | 65.3 (9.9)                      | 714   | 567     | 1.001               | > 0.050     | 1.761                     | < 0.001     |
| C18     | 1,251 | 68.2 (9.8)                      | 802   | 449     | 1.790               | < 0.001     | 3.421                     | < 0.001     |
| C19     | 1,168 | 58.5 (9.7)                      | 995   | 173     | 0.752               | < 0.050     | 1.571                     | > 0.050     |
| C20     | 1,119 | 71.5 (11.3)                     | 713   | 406     | 1.213               | > 0.050     | 1.782                     | < 0.001     |
| C21     | 1,000 | 61.0 (11.0)                     | 769   | 231     | 1.116               | > 0.050     | 0.890                     | > 0.050     |
| C22     | 988   | 69.2 (10.4)                     | 516   | 472     | 1.023               | > 0.050     | 0.978                     | > 0.050     |
| C23     | 935   | 58.7 (12.2)                     | 588   | 347     | 1.609               | < 0.001     | 2.275                     | < 0.001     |
| C24     | 932   | 67.9 (10.1)                     | 28    | 904     | 0.787               | > 0.050     | 1.589                     | < 0.001     |
| C25     | 860   | 56.2 (9.9)                      | 664   | 196     | 0.978               | > 0.050     | 2.691                     | < 0.001     |
| C26     | 852   | 58.7 (12.1)                     | 391   | 461     | 0.939               | > 0.050     | 1.108                     | > 0.050     |
| C27     | 823   | 65.1 (10.9)                     | 532   | 291     | 1.201               | > 0.050     | 1.289                     | > 0.050     |
| C28     | 686   | 71.7 (8.0)                      | 673   | 13      | 0.866               | > 0.050     | 1.786                     | < 0.001     |
| C29     | 550   | 57.2 (11.1)                     | 435   | 115     | 0.906               | > 0.050     | 0.985                     | > 0.050     |
| C30     | 533   | 61.2 (11.7)                     | 391   | 172     | 1.874               | < 0.001     | 5.364                     | < 0.001     |
| C31     | 520   | 64.4 (11.2)                     | 213   | 307     | 1.052               | > 0.050     | 1.484                     | > 0.050     |
| NA*     | 5,113 | 60.1 (11.1)                     | 3,878 | 1,235   | NA                  | NA          | NA                        | NA          |

258

\*Patients that did not cluster or were in clusters of size < 500

259 *Clusters, clinical outcomes, and phenotypic enrichment*

260 To assess if the unsupervised clustering identified patient subgroups at different risks of  
261 disease progression, we used cluster-membership (C1-C31) as a covariate in a series of Cox  
262 models. A total of 14,679 patients experienced a new ischemic event during follow-up and  
263 10,684 patients died from other causes than IHD. Mean follow-up times was 3.72 years  
264 (Table 1). Risks for new ischemic events and death from non-IHD causes in each cluster were  
265 compared to the pooled risk for patients in the remaining 30 clusters. The survival analysis  
266 demonstrated that the MCL algorithm stratified patients according to risk of new ischemic  
267 events and death from non-IHD causes (Fig 3). Comparing each cluster to all the others  
268 (n=30), seven clusters (20,221 patients) had a statistically significantly higher (five clusters)  
269 or lower (two clusters) risk of new ischemic events; and 18 clusters (43,173 patients) had a  
270 higher (14 clusters) or lower (four clusters) risk of death from non-IHD causes. All clusters at  
271 increased risk of new ischemic events, associated with risk of death from non-IHD causes as  
272 well. Thus, 11 clusters (23,963 patients) did not have altered risk of the two outcomes, when  
273 compared to the other clusters (Fig 1D).

Fig 3

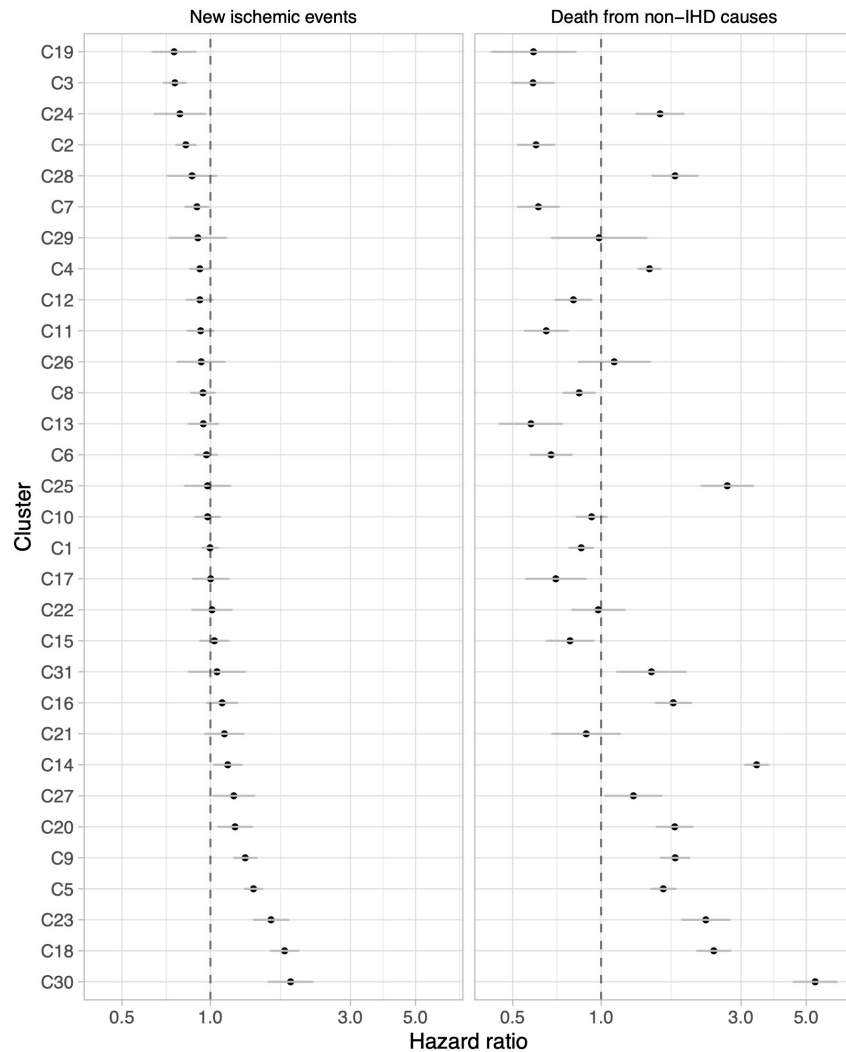

274

275 **Fig 3: Risk of new ischemic events and non-IHD causes stratified by cluster.** Forest  
276 plots where clusters are shown against HR for new ischemic events (left) and death from non-  
277 IHD causes (right). X-axis: HR for a single cluster relative to mean HR of the 30 other  
278 clusters. Y-axis: Clusters arranged by risk of new ischemic events, increasing risk from top to  
279 bottom. IHD: Ischemic heart disease. HR: Hazard ratio.

280 The distribution of O/E-ratios was heavily left-skewed as less than 99% (n=101) of all O/E-  
281 ratios were >10 and roughly 7% (n=887) of all O/E-ratios were >2. About 60% of all O/E-  
282 ratios (n=8,056) were in the range of 0 and 1 corresponding to inverse changes. Generally,  
283 clusters that had high risk of new ischemic events or death from non-IHD causes were also  
284 characterized by large, summarized O/E-values corresponding to a high degree of  
285 multimorbidity (S5 Table). To obtain an overview of the results of the risk stratification in  
286 conjunction with the enrichment analysis, clusters were described according to three  
287 categories: (1) clusters enriched for cardiometabolic or -vascular diseases, (2) clusters  
288 enriched for degenerative or inflammatory diseases and (3) clusters enriched characterized by  
289 little enrichment and inverse changes.

290

#### 291 *Clusters enriched for cardiometabolic and -vascular diseases*

292 Four of the five clusters at increased risk of new ischemic events (and death from non-IHD  
293 causes) were enriched for diabetes (C5, C18, C23, and C30). In these four clusters, HRs  
294 ranged from 1.40 (C5, 95%CI: 1.30;1.50, adj. P-val. < 0.001) to 1.88 (C30, 95%CI:  
295 1.60;2.00, adj. P-val. < 0.001) with a significant difference in age at index (C5: 63.9 years,  
296 C30: 61.2 years, Adj. P-val. < 0.001, TukeyHSD). C18 and C23 were only enriched for  
297 insulin-dependent diabetes, but differed in that C18 was also enriched for insulin-dependent  
298 diabetes with vascular complications and periphery atherosclerosis. In contrast, C5 was only  
299 enriched for non-insulin dependent diabetes and included diabetes with as well as without  
300 complications. Lastly, C30 was only enriched for diabetes with complications (insulin and  
301 non-insulin dependent) and was the diabetes cluster enriched for chronic kidney disease and  
302 bacterial infections, as well (S5 Table).

303

304 Other cardiac diseases that displayed enrichment were supraventricular arrhythmias (C4),  
305 cardiomyopathies (C9), and valve diseases (C20). Of the three clusters, only C9 had  
306 increased risk of new ischemic events (HR: 1.31 (C9, 95%CI: 1.20;1.44, adj. P-val.: < 0.001).  
307 Risk of death from non-IHD causes was 1.79 (95%CI: 1.60;2.00, adj. P-val. < 0.001). In  
308 contrast, C4 and C20 only had increased risk of death from non-IHD causes with HRs of 1.49  
309 (C4, 95%CI: 1.34;1.59, adj. P-val. < 0.001) and 1.78 (C20, 95%CI: 1.54;2.04, adj. P-val. <  
310 0.001). Interestingly, the cluster enriched for cerebrovascular diseases (C27) did not have  
311 altered risk of any of the two outcomes. In sum, all clusters that had increased risk of new  
312 ischemic events were enriched for cardiometabolic diseases, albeit not all clusters enriched  
313 for cardiometabolic and -vascular diseases had increased risk of new ischemic events (Table  
314 2 and S5 Table).

315

#### 316 *Clusters enriched for degenerative or inflammatory diseases*

317 Six clusters (C7, C13, C14, C22, C26, and C31) were enriched for diagnoses describing  
318 degenerative or inflammatory diseases, i.e., osteoarthritis (C7), degenerative spine disease  
319 (C13 and C22), chronic obstructive pulmonary disease (C14), asthma (C26), and rheumatoid  
320 arthritis (C31). Remarkably, none of the four clusters had increased risk of new ischemic  
321 events and only one cluster (C14) had increased risk of death from non-IHD causes (HR:  
322 3.39, 95%CI: 3.09;3.71, adj. P-val. < 0.001). Conversely, C7 and C13 had reduced risk of  
323 death from non-IHD causes (C7, HR: 0.61, 95%CI: 0.52;0.72, adj. P-val. < 0.001 and C13,  
324 HR: 0.58, 95%CI: 0.45;0.74, adj. P-val. < 0.001). Age at index for the clusters enriched for  
325 degenerative or inflammatory diseases range between 58.6 years (C13) and 69.2 years (C22)  
326 (Table 2). Taken together, these findings hint to the dual nature of inflammation as a potential  
327 disease modifier as well as a risk factor.

328

329 *Clusters characterized by little enrichment and inverse changes*

330 Six clusters (C1, C2, C3, C6, C15, and C17) were characterized by little enrichment, which  
331 included the two clusters with reduced risk of new ischemic events (C2, HR: 0.82, 95%CI:  
332 0.76;0.89, adj. P-val. < 0.001 and C3, HR: 0.76, 95%CI: 0.52;0.69, adj. P-val. < 0.001). Not  
333 surprisingly, none of these six clusters had increased risk of either of the two outcomes, but  
334 three clusters (C2, C3, and C6) had reduced risk of death from non-IHD causes (C2, HR:  
335 0.60, 95%CI: 0.52;0.69, adj. P-val. < 0.001, C3, HR: 0.59, 95%CI: 0.59;0.69, adj. P-val. <  
336 0.001 and C6, HR: 0.68, 95%CI: 0.57;0.79, adj. P-val. < 0.001) (Table 2). It was a common  
337 attribute of the clusters without altered risk of any of the two outcomes that O/E-ratios for  
338 hypertension and dyslipidemia were among the largest. In contrast, diabetes, heart failure,  
339 and chronic obstructive pulmonary disease frequently displayed inverse changes (O/E-ratios  
340 < 1) in these clusters (S5 Table). Taken together, these observations indicate that risk of  
341 disease progression in this populations necessitates a more sophisticated analysis of  
342 multimorbidity.

343

344 For a list with results of the enrichment analysis for all clusters, including the 13 clusters not  
345 described above, S5 Table.

346

347 *Clusters and their association with laboratory measurements and genetic data*

348 Clusters were also characterized by means of datatypes not included among the MCL  
349 algorithm input features. For patients in the 31 clusters, we had laboratory measurements on  
350 30,755 (49.5%) and genetic data on 19,422 (31.3%). To assess if the phenotypic differences  
351 captured by the MCL algorithm were also reflected in laboratory measurements, we tested if  
352 the distributions of test results within and out of reference ranges differed significantly. There  
353 were significantly different distributions of tests within and out of reference ranges in clusters

354 for the 24 most frequent tests. Overall, this indicates that the phenotypic patterns within the  
355 entire spectrum of cardiovascular multimorbidity registered before index correlate with  
356 results of clinical laboratory tests (S6 Table). Thus, these findings are a strong indicator that  
357 the patterns captured by the MCL algorithm are biologically relevant. For a graphical  
358 summary of the laboratory scores in each cluster, see S4 Figure.

359

360 Finally, we identified 41 cases (out of 434 tests) where the PRS distribution for a specific  
361 trait in cluster was significantly different from that trait's combined PRS distribution of the  
362 other 30 clusters. Among these cases, we found the largest effects size to be a higher genetic  
363 risk for atrial fibrillation in cluster C4 (0.57, FDR < 0.001) as well as a higher genetic risk for  
364 non-insulin dependent diabetes in cluster C5 (0.55, FDR < 0.001). These findings are  
365 congruent with the results of the enrichment analysis for C4 and C5, respectively. In contrast,  
366 C1 (phenotypically characterized by inverse changes) had relatively large, positive effect  
367 sizes for systolic as well as diastolic blood pressure (0.20 and 0.16, FDR < 0.001). Similarly,  
368 there were positive effect sizes for total cholesterol and triglycerides in C6, which was also  
369 characterized by little phenotypic enrichment as well as a high degree of inverse changes. A  
370 list of significant effect sizes for the 41 significant cases, see S7 Table.

## 371 **Discussion**

372 In this study, we developed a novel, data-driven method for structuring the entire spectrum of  
373 multimorbidity by means of an unsupervised clustering analysis. In a cohort of 72,249  
374 patients with IHD patients, we identified 31 distinct clusters (67,136 patients) based on 3,046  
375 diagnoses assigned prior to or at index. By comparing risk of new ischemic events and death  
376 from non-IHD causes across clusters and then performing an enrichment analysis, we found  
377 that clusters at increased risk of new ischemic events were enriched for diabetes (four  
378 clusters) or cardiomyopathies (one cluster). Neither the cluster enriched for supraventricular



379 arrhythmias, nor valve diseases had increased risk of new ischemic events. Degenerative and  
380 inflammatory diseases were enriched in a total of six clusters and displayed no clear trend in  
381 their relation to the outcomes. The results of the enrichment analysis were supported by  
382 trends in laboratory test results and clusters enriched for supraventricular arrhythmias and non-  
383 insulin diabetes also had congruently, higher genetic risks.

384

385 The results of the study agree with common knowledge on risk of IHD, while also adding  
386 insights to the disease-diseases associations, which are currently underappreciated in the  
387 literature. The fact that clusters enriched for diabetes were generally the most high-risk  
388 clusters serves as a methodological reality check(6). Added value of the study lies in the fact  
389 that the method allows for a more sophisticated description of such associations, as the  
390 method allows to study the entire spectrum of multimorbidity. For example, four clusters  
391 were enriched for diabetes, which is in line with the current paradigm that a single term is  
392 insufficient to describe a multifactorial disease, such as diabetes(16,29). By integrating  
393 different data types, the findings indicate how phenotypic and genetic data complement each  
394 other, by exemplifying (1) that clustering analysis facilitates stronger genetic signals in  
395 patient subgroups and (2) that genetic data may unveil patterns not captured by phenotypic  
396 data alone.

397

398 In addition, the method developed in this study and subsequent findings add perspective to  
399 the relatively limited body of literature regarding associations between chronic inflammatory  
400 and cardiovascular diseases(7). While previous studies have concluded that the risk of  
401 cardiovascular diseases is increased in most chronic inflammatory disorders, the results of  
402 our study indicate that pre-existing degenerative or inflammatory disorders in patients with  
403 IHD do not increase the risk of new ischemic events.

404 The pre-selected outcomes in the present study are also a unique aspect of the study, as  
405 previous clustering analyses within the cardiovascular domain studies have mainly analyzed  
406 all-cause mortality(17,18). This aspect of the study allows to distinguish between risk of  
407 progression related to IHD and risk of progression that is related to comorbidity drawing  
408 attention to important aspects of multimorbidity in this domain. For example, clusters  
409 enriched for supraventricular arrhythmias and chronic obstructive pulmonary disease,  
410 respectively, only had increased risk of death from non-IHD causes. The study design,  
411 including the enrichment analysis, also revealed that classical risk factors for IHD (e.g.,  
412 hypertension and dyslipidemia) did not drive the clustering. This finding agrees with  
413 previously published comorbidity phenotypes in patients with IHD(18). We argue that the  
414 present study displays that continuous exploration and characterization of multimorbidity in  
415 IHD are key elements in optimizing the exploit the full potential of continuously developing  
416 treatment strategies.

417

418 Previous clustering analyses within the cardiovascular domain have typically included either  
419 thousands of patients or hundreds of input features, but not both(14,15). For example, Hall et  
420 al. defined multimorbidity using only eight different chronic conditions, whereas Crowe et al.  
421 defined multimorbidity with reference to 20 predefined conditions(17,18). Thus, the scale of  
422 our study exceeds that of previous work, as it includes more than 70,000 patients and more  
423 than 3,000 input features. And further, we limited the risk of introducing bias by not exerting  
424 feature selection prior to clustering.

425

426 The two main limitations with respect to the data foundation are that (1) owing to the novelty  
427 of the method, there were no standardized way of assessing the representation of  
428 multimorbidity and (2) it was only a subset for which laboratory and genetic data were

429 available. These challenges are naturally overcome in clustering analyses based on data from  
430 randomized controlled trials, such as the studies by Inohara et al, and Karwath et al.(15,19)  
431 However, in the present, data-rich era, we argue that it is highly important to develop  
432 methods for structuring and studying other data than what is being collected for trials. Ideally,  
433 the two approaches, based on nationwide data and randomized controlled trials, respectively,  
434 will complement each other; and will facilitate more precise identification of patients who are  
435 likely to benefit from different treatment options as well as guide optimized selection of  
436 patients for randomized controlled trials .

437

438 In sum, the study further showcases the strengths of a more fine-grained analysis of patient  
439 subgroups, which, in turn, may pave the way for successful implementation of precision  
440 medicine. Owing to its flexibility, the comprehensive, data-driven analysis of cardiovascular  
441 multimorbidity represents a novel method for characterizing multimorbidity in IHD with  
442 great potential of applying it to other diseases of interest or other clinical data. Such trends  
443 may guide clinical decision making in cases, where for example it is not obvious how to  
444 manage the angiographic findings or the combination of drugs that a specific patient will  
445 benefit most from.

446

447 In conclusion, the present study cements the complexity of multimorbid patients with IHD  
448 and exemplifies the clinical relevance of a more fine-grained patient subgrouping by carrying  
449 out a cluster-based risk-stratifying the cohort. Further, owing to its flexibility, the  
450 comprehensive, data-driven method of cardiovascular multimorbidity presented here  
451 represents a novel method for characterizing multimorbidity in IHD with great potential.  
452 Improved patient subgrouping may be critical guide future clinical decision making in cases,

453 where it is non-trivial how to manage the angiographic findings or to find the optimal

454 combination of drugs for a given patient.

455

## 456 **Acknowledgement**

457 The authors would like to thank (1) research programmer, Troels Siggaard, Novo Nordisk  
458 Foundation Center for Research, University of Copenhagen, Denmark for continuous and  
459 reliable infrastructure support, and (2) Head of Cardiovascular Research, Hilma Hólm,  
460 deCODE genetics, Iceland for insightful comments.

461

## 462 **References**

- 463 1. Antman EM, Braunwald E. Managing Stable Ischemic Heart Disease. *N Engl J Med*. 2020  
464 Apr 9;382(15):1468–70.
- 465 2. Ferraro R, Latina JM, Alfaddagh A, Michos ED, Blaha MJ, Jones SR, et al. Evaluation and  
466 Management of Patients With Stable Angina: Beyond the Ischemia Paradigm. *J Am Coll*  
467 *Cardiol*. 2020 Nov 10;76(19):2252–66.
- 468 3. Nabel EG, Braunwald E. A tale of coronary artery disease and myocardial infarction. *N*  
469 *Engl J Med*. 2012 Jan 5;366(1):54–63.
- 470 4. Forman DE, Maurer MS, Boyd C, Brindis R, Salive ME, Horne FM, et al. Multimorbidity  
471 in Older Adults With Cardiovascular Disease. *J Am Coll Cardiol*. 2018 May  
472 15;71(19):2149–61.
- 473 5. Afilalo J, Alexander KP, Mack MJ, Maurer MS, Green P, Allen LA, et al. Frailty  
474 Assessment in the Cardiovascular Care of Older Adults. *J Am Coll Cardiol*. 2014 Mar  
475 4;63(8):747–62.
- 476 6. The Emerging Risk Factors Collaboration. Association of Cardiometabolic Multimorbidity  
477 With Mortality. *JAMA*. 2015 Jul 7;314(1):52–60.
- 478 7. Dregan A, Charlton J, Chowienczyk P, Gulliford MC. Chronic Inflammatory Disorders  
479 and Risk of Type 2 Diabetes Mellitus, Coronary Heart Disease, and Stroke. *Circulation*.  
480 2014 Sep 2;130(10):837–44.
- 481 8. Glynn LG. Multimorbidity: another key issue for cardiovascular medicine. *The Lancet*.  
482 2009 Oct 24;374(9699):1421–2.
- 483 9. Joshi A, Rienks M, Theofilatos K, Mayr M. Systems biology in cardiovascular disease: a  
484 multiomics approach. *Nat Rev Cardiol*. 2021 May;18(5):313–30.
- 485 10. Khera Amit V., Kathiresan Sekar. Is Coronary Atherosclerosis One Disease or Many?  
486 *Circulation*. 2017 Mar 14;135(11):1005–7.
- 487 11. Rahimi K, Lam CSP, Steinhubl S. Cardiovascular disease and multimorbidity: A call for  
488 interdisciplinary research and personalized cardiovascular care. *PLOS Med*. 2018 Mar  
489 27;15(3):e1002545.
- 490 12. Kaufman L, Rousseeuw PJ. *Finding Groups in Data: An Introduction to Cluster Analysis*.  
491 John Wiley & Sons; 2009. 369 p.
- 492 13. Shah RV, Yeri AS, Murthy VL, Massaro JM, D’Agostino R Sr, Freedman JE, et al.  
493 Association of Multiorgan Computed Tomographic Phenomap With Adverse  
494 Cardiovascular Health Outcomes: The Framingham Heart Study. *JAMA Cardiol*. 2017  
495 Nov 1;2(11):1236–46.
- 496 14. Ahmad T, Pencina MJ, Schulte PJ, O’Brien E, Whellan DJ, Piña IL, et al. Clinical  
497 implications of chronic heart failure phenotypes defined by cluster analysis. *J Am Coll*  
498 *Cardiol*. 2014 Oct 28;64(17):1765–74.

- 499 15. Inohara T, Shrader P, Pieper K, Blanco RG, Thomas L, Singer DE, et al. Association of  
500 of Atrial Fibrillation Clinical Phenotypes With Treatment Patterns and Outcomes: A  
501 Multicenter Registry Study. *JAMA Cardiol*. 2018 Jan 1;3(1):54–63.
- 502 16. Ahlqvist E, Storm P, Käräjämäki A, Martinell M, Dorkhan M, Carlsson A, et al. Novel  
503 subgroups of adult-onset diabetes and their association with outcomes: a data-driven  
504 cluster analysis of six variables. *Lancet Diabetes Endocrinol* [Internet]. 2018 Mar;0(0).  
505 Available from: <http://www.ncbi.nlm.nih.gov/pubmed/29503172>
- 506 17. Hall M, Dondo TB, Yan AT, Mamas MA, Timmis AD, Deanfield JE, et al.  
507 Multimorbidity and survival for patients with acute myocardial infarction in England and  
508 Wales: Latent class analysis of a nationwide population-based cohort. *PLOS Med*. 2018  
509 Mar 6;15(3):e1002501.
- 510 18. Crowe F, Zemedikun DT, Okoth K, Adderley NJ, Rudge G, Sheldon M, et al.  
511 Comorbidity phenotypes and risk of mortality in patients with ischaemic heart disease in  
512 the UK. *Heart*. 2020 Jun 1;106(11):810–6.
- 513 19. Karwath A, Bunting KV, Gill SK, Tica O, Pendleton S, Aziz F, et al. Redefining  $\beta$ -  
514 blocker response in heart failure patients with sinus rhythm and atrial fibrillation: a  
515 machine learning cluster analysis. *The Lancet*. 2021 Oct 16;398(10309):1427–35.
- 516 20. Bowman L, Baras A, Bombien R, Califf RM, Chen Z, Gale CP, et al. Understanding the  
517 use of observational and randomized data in cardiovascular medicine. *Eur Heart J*. 2020  
518 Jul 14;41(27):2571–8.
- 519 21. Schmidt M, Schmidt SAJ, Adelborg K, Sundbøll J, Laugesen K, Ehrenstein V, et al. The  
520 Danish health care system and epidemiological research: from health care contacts to  
521 database records. *Clin Epidemiol*. 2019;11:563–91.
- 522 22. Hemingway H, Asselbergs FW, Danesh J, Dobson R, Maniadakis N, Maggioni A, et al.  
523 Big data from electronic health records for early and late translational cardiovascular  
524 research: challenges and potential. *Eur Heart J*. 2018 Apr 21;39(16):1481–95.
- 525 23. Helweg-Larsen K. The Danish Register of Causes of Death. *Scand J Public Health*. 2011  
526 Jul;39(7 Suppl):26–9.
- 527 24. Sørensen E, Christiansen L, Wilkowski B, Larsen MH, Burgdorf KS, Thøner LW, et al.  
528 Data Resource Profile: The Copenhagen Hospital Biobank (CHB). *Int J Epidemiol*  
529 [Internet]. 2020 Nov 10 [cited 2020 Dec 13];(dyaa157). Available from:  
530 <https://doi.org/10.1093/ije/dyaa157>
- 531 25. Schmidt M, Pedersen L, Sørensen HT. The Danish Civil Registration System as a tool in  
532 epidemiology. *Eur J Epidemiol*. 2014 Aug 1;29(8):541–9.
- 533 26. Sundbøll J, Adelborg K, Munch T, Frøslev T, Sørensen HT, Bøtker HE, et al. Positive  
534 predictive value of cardiovascular diagnoses in the Danish National Patient Registry: a  
535 validation study. *BMJ Open* [Internet]. 2016 Nov 1 [cited 2020 Jan 15];6(11). Available  
536 from: <https://bmjopen.bmj.com/content/6/11/e012832>
- 537 27. Enright AJ, Van Dongen S, Ouzounis CA. An efficient algorithm for large-scale  
538 detection of protein families. *Nucleic Acids Res*. 2002 Apr;30(7):1575–84.

- 539 28. MCL - a cluster algorithm for graphs [Internet]. [cited 2023 Jan 30]. Available from:  
540 <http://micans.org/mcl/>
- 541 29. Kirk IK, Simon C, Banasik K, Holm PC, Haue AD, Jensen PB, et al. Linking glycemic  
542 dysregulation in diabetes to symptoms, comorbidities, and genetics through EHR data  
543 mining. Valencia A, Barkai N, editors. *eLife*. 2019 Dec 10;8:e44941.
- 544 30. Meilă M. Comparing clusterings—an information based distance. *J Multivar Anal*. 2007  
545 May 1;98(5):873–95.
- 546 31. Nielsen JB, Thorolfsdottir RB, Fritsche LG, Zhou W, Skov MW, Graham SE, et al.  
547 Biobank-driven genomic discovery yields new insight into atrial fibrillation biology. *Nat*  
548 *Genet*. 2018 Sep;50(9):1234–9.
- 549 32. Mahajan A, Taliun D, Thurner M, Robertson NR, Torres JM, Rayner NW, et al. Fine-  
550 mapping type 2 diabetes loci to single-variant resolution using high-density imputation  
551 and islet-specific epigenome maps. *Nat Genet*. 2018 Nov;50(11):1505–13.
- 552 33. Wuttke M, Li Y, Li M, Sieber KB, Feitosa MF, Gorski M, et al. A catalog of genetic loci  
553 associated with kidney function from analyses of a million individuals. *Nat Genet*. 2019  
554 Jun;51(6):957–72.
- 555 34. Surakka I, Horikoshi M, Mägi R, Sarin AP, Mahajan A, Lagou V, et al. The impact of  
556 low-frequency and rare variants on lipid levels. *Nat Genet*. 2015 Jun;47(6):589–97.
- 557 35. Shah S, Henry A, Roselli C, Lin H, Sveinbjörnsson G, Fatemifar G, et al. Genome-wide  
558 association and Mendelian randomisation analysis provide insights into the pathogenesis  
559 of heart failure. *Nat Commun*. 2020 Jan 9;11(1):163.
- 560 36. Malik R, Chauhan G, Traylor M, Sargurupremraj M, Okada Y, Mishra A, et al.  
561 Multiancestry genome-wide association study of 520,000 subjects identifies 32 loci  
562 associated with stroke and stroke subtypes. *Nat Genet*. 2018 Apr;50(4):524–37.
- 563 37. Jiang L, Zheng Z, Fang H, Yang J. A generalized linear mixed model association tool for  
564 biobank-scale data. *Nat Genet*. 2021 Nov;53(11):1616–21.
- 565 38. van der Harst P, Verweij N. Identification of 64 Novel Genetic Loci Provides an  
566 Expanded View on the Genetic Architecture of Coronary Artery Disease. *Circ Res*. 2018  
567 Feb 2;122(3):433–43.
- 568 39. Hoffmann TJ, Ehret GB, Nandakumar P, Ranatunga D, Schaefer C, Kwok PY, et al.  
569 Genome-wide association analyses using electronic health records identify new loci  
570 influencing blood pressure variation. *Nat Genet*. 2017 Jan;49(1):54–64.
- 571 40. Anstee QM, Darlay R, Cockell S, Meroni M, Govaere O, Tiniakos D, et al. Genome-wide  
572 association study of non-alcoholic fatty liver and steatohepatitis in a histologically  
573 characterised cohort☆. *J Hepatol*. 2020 Sep 1;73(3):505–15.
- 574 41. Privé F, Arbel J, Vilhjálmsson BJ. LDpred2: better, faster, stronger. *Bioinformatics*. 2020  
575 Dec 1;36(22–23):5424–31.



- 576 42. R Core Team. R: A Language and Environment for Statistical Computing [Internet].  
577 Vienna, Austria: R Foundation for Statistical Computing; 2020. Available from:  
578 <https://www.R-project.org/>
- 579 43. Mölder F, Jablonski KP, Letcher B, Hall MB, Tomkins-Tinch CH, Sochat V, et al.  
580 Sustainable data analysis with Snakemake [Internet]. F1000Research; 2021 [cited 2023  
581 Mar 16]. Available from: <https://f1000research.com/articles/10-33>
- 582 44. Violán C, Roso-Llorach A, Foguet-Boreu Q, Guisado-Clavero M, Pons-Vigués M, Pujol-  
583 Ribera E, et al. Multimorbidity patterns with K-means nonhierarchical cluster analysis.  
584 BMC Fam Pract. 2018 Jul 3;19(1):108.
- 585

## 586 **Supporting information captions**

587 **S1 Fig: Classification of new ischemic events.**

588 **S1 Table: Eligible codes for inclusion and outcomes**

589 **S1 Appendix: MCL algorithm settings and assessment of cluster robustness**

590 • **S2 Fig: Selection of number of components.**

591 • **S3 Fig: Limiting edge-density and average node degree in sex-specific similarity**  
592 **networks.**

593 **S2 Appendix: Preprocessing of laboratory data**

594 • **S2 Table: Laboratory codes included in assessment of data quality and completeness**

595 **S3 Appendix: Calculation of polygenetic risk scores for 14 traits**

596 **S3 Table: Comparison of mean age at index in 31 cluster using Tukey's HSD**

597 **S4 Table: Demographics for patients not cluster or were in clusters of size < 500**

598 **S5 Table: Cluster-wise summarized O/E-ratios, 10 largest O/E-ratios and 10 lowest**  
599 **O/E-ratios.**

600 **S6 Table: Chi-squared test for distribution laboratory values in clusters**

601 **S7 Table: Traits with significantly different PGS distributions in clusters**
